# Supplementary material for: Msp40 effector of root-knot nematode manipulates plant immunity to facilitate parasitism
Source: PubMed Central journal article supplement (PMC4726423; doi:10.1038/srep19443), 2016-01-22

## Supplementary information

### **Msp40 effector of root-knot nematode manipulates plant immunity to facilitate parasitism**

Junhai Niu<sup>1, 2#</sup>, Pei Liu<sup>1#</sup>, Qian Liu<sup>1</sup>, Changlong Chen<sup>1</sup>, Quanxin Guo<sup>1</sup>, Junmei Yin<sup>2</sup>,  
Guangsui Yang<sup>2</sup>, Heng Jian<sup>1\*</sup>

1. Department of Plant Pathology and Key Laboratory of Plant Pathology of Ministry of Agriculture, China Agricultural University, Beijing 100193, China

2. Tropical Crops Genetic Resources Institute, CATAS / Key Laboratory of Crop Gene Resources and Germplasm Enhancement in Southern China, Danzhou, Hainan 571737, China

#: Both authors contributed equally.

\*: Corresponding author

Prof. Heng Jian

Department of Plant Pathology, China Agricultural University, Beijing 100193, P. R.

China

Phone and Fax: 86-10-62731102

E-mail: [hengjian@cau.edu.cn](mailto:hengjian@cau.edu.cn)

### Supplemental Table S1.

The platforms about nematodes genome and transcripts used for *Msp40* homologies screening.

| <b>Species</b>          | <b>Types</b>          | <b>Blast server links</b>                                                                                                                                                                                                                            |
|-------------------------|-----------------------|------------------------------------------------------------------------------------------------------------------------------------------------------------------------------------------------------------------------------------------------------|
| <i>M. incognita</i>     | Root-knot nematode    | <a href="http://meloidogyne.toulouse.inra.fr/blast/blast.html">http://meloidogyne.toulouse.inra.fr/blast/blast.html</a>                                                                                                                              |
| <i>M. hapla</i>         | Root-knot nematode    | <a href="http://www.pngg.org/cbnp/index.php?option=com_wrapper&amp;Itemid=8">http://www.pngg.org/cbnp/index.php?option=com_wrapper&amp;Itemid=8</a>                                                                                                  |
| <i>M. floridensis</i>   | Root-knot nematode    | <a href="http://nematodes.org/genomes/meloidogyne_floridensis/">http://nematodes.org/genomes/meloidogyne_floridensis/</a>                                                                                                                            |
| <i>G. rostochiensis</i> | Potato cyst nematodes | <a href="http://nematode.net/NN3_frontpage.cgi?navbar_selection=speciestable&amp;subnav_selection=Globodera_rostochiensis">http://nematode.net/NN3_frontpage.cgi?navbar_selection=speciestable<br/>&amp;subnav_selection=Globodera_rostochiensis</a> |
| <i>G. pallida</i>       | Potato cyst nematode  | <a href="http://www.sanger.ac.uk/cgi-bin/blast/submitblast/g_pallida">http://www.sanger.ac.uk/cgi-bin/blast/submitblast/g_pallida</a>                                                                                                                |
| <i>H. glycines</i>      | Soybean cyst nematode | <a href="http://nematode.net/NN3_frontpage.cgi?navbar_selection=speciestable&amp;subnav_selection=Heterodera_glycines">http://nematode.net/NN3_frontpage.cgi?navbar_selection=speciestable<br/>&amp;subnav_selection=Heterodera_glycines</a>         |
| <i>B. xylophilus</i>    | Pine wood nematode    | <a href="http://www.genedb.org/blast/submitblast/GeneDB_Bxylophilus">http://www.genedb.org/blast/submitblast/GeneDB_Bxylophilus</a>                                                                                                                  |
| <i>C. elegans</i>       | Free-living nematode  | <a href="http://www.wormbase.org/tools/blast_blat">http://www.wormbase.org/tools/blast_blat</a>                                                                                                                                                      |
| Other nematode species  |                       | <a href="http://blast.ncbi.nlm.nih.gov/Blast.cgi">http://blast.ncbi.nlm.nih.gov/Blast.cgi</a>                                                                                                                                                        |

**Supplemental Table S2. Overview of the reference and target genes used in this study.** (The underlined regions represent cleavages sites of restriction enzymes.)

| Genes                         | Primers                                     | Primer sequences (5'–3')                   | Length             | Usage                            |
|-------------------------------|---------------------------------------------|--------------------------------------------|--------------------|----------------------------------|
| <i>Msp40</i><br>(AY422833)    | Msp40 cds F                                 | GGTCATTCTTATAACTAAAAACCTTCAAAC             | 1150bp             | Full length cDNA and DNA cloning |
|                               | Msp40 cds R                                 | AATTACGAGAAACACGGATGAATAGAT                |                    |                                  |
|                               | M40 qRT-F1                                  | GCAAAGAATCATGTAATGGGATACTG                 | 244bp              | qRT-PCR                          |
|                               | M40 qRT-R1                                  | TGAGACAATCAGAAATCATAGTCGGT                 |                    |                                  |
|                               | M40 Sb F                                    | CCATTATTGCTTTTGCTTACCCTT                   | 857bp              | Southern blotting                |
|                               | M40 Sb R                                    | GCACAATCAGAAATCATAGTCGGT                   |                    |                                  |
|                               | M40-- F1 KpnI                               | CGGG <u>G</u> TACCATGGAGGAGGATAAGGAAG      | 945bp              | Subcellular localization         |
|                               | M40--F2 KpnI                                | CGGG <u>G</u> TACCATGGAGGAGGATAAGGGAGA     | 882bp              |                                  |
|                               | M40-- R1 XbaI                               | TG <u>C</u> TAGAAGCAGCAGCTGCTGCAAGT        |                    |                                  |
|                               | Msp40 P1S                                   | AAGATGCTGAGAGTGCAGAGGAG                    | 356bp              | in situ hybridization            |
|                               | MSP40 P1A                                   | CTTGTCATCTTCTCCTTTTATCC                    |                    |                                  |
|                               | M40-NcoI                                    | TTG <u>C</u> ATGGATGGAGGAGGATAAGGAAGACAT   | 948bp              | Host expression                  |
|                               | M40-BstE II                                 | TTT <u>G</u> TGACCCTTAAGCAGCAGCTGCTG       |                    |                                  |
|                               | TS1-BglII                                   | CC <u>A</u> GATCTAAGATGCTGAGAGTGCAGAGGAG   | 354bp              | In vivo RNAi 1                   |
|                               | TS1-EcoRI                                   | CC <u>G</u> AATTCCTTGTCATCTTCTCCTTTTATCC   |                    |                                  |
|                               | TS1- Sall                                   | CC <u>T</u> GCAAGGTCGACCTTGTCATCTTCC       |                    |                                  |
|                               | TS1-BamHI-BstE II                           | AATT <u>G</u> GATCCGGTGACCAAGATGCTGAGAGTGC |                    |                                  |
|                               | TS2 -BglII                                  | TTG <u>A</u> GATCATGTAATGGGATACTGC         | 292bp              | In vivo RNAi 2                   |
|                               | TS2- EcoRI                                  | TTG <u>G</u> AATTCAGCTGCTGCAAGTCTCTT       |                    |                                  |
|                               | TS2 -Sall                                   | A <u>A</u> GTCGACAGCTGCTGCAAGTCTCTT        |                    |                                  |
| TS2-BamHI-BstEII              | CGC <u>G</u> GATCCGGTTACCCATGTAATGGGATACTGC |                                            |                    |                                  |
| Msp40_SmaI                    | TAT <u>C</u> CCGGGATGGAGGAGGATAAGGGAG       | 882bp                                      | Suppression of PCD |                                  |
| Msp40_SaII                    | CTA <u>G</u> TGCACTTAAGCAGCAGCTGCTGCA       |                                            |                    |                                  |
| <i>α-Tublin</i><br>(CK983765) | Mi Tub qRT-F                                | AAAAGAGGCTGAGGGTTGTGATTG                   | 206bp              | qRT-PCR (Control)                |
|                               | Mi Tub qRT-R                                | GAACAGAAAGAGTTGCGTTGTAGGG                  |                    |                                  |
| CHAS intron<br>(EU049859)     | CHAS F                                      | CGTTTATCTTAATGGCTCTTC                      | 1312bp             | RT-PCR                           |
|                               | CHAS R                                      | CCTGCAAATTGACCAAAAAAG                      |                    |                                  |
| <i>FRK1</i><br>(AT2G19190)    | FRK1 qRT_F                                  | TGCAGCGCAAGGACTAGAG                        | 108bp              | qRT-PCR                          |
|                               | FRK1 qRT_R                                  | ATCTTCGCTGGAGCTTCTC                        |                    |                                  |
| <i>PAD4</i><br>(AT3G5243)     | PAD4 qRT_F                                  | GCCGCTTTCACCCACTTTGG                       | 102bp              | qRT-PCR                          |
|                               | PAD4 qRT_R                                  | GAGAGATTGGTTCCGAGCAGAGG                    |                    |                                  |
| <i>WRKY29</i><br>(AT4G23550)  | WRKY29 qRT_F                                | ATCCAACGGATCAAGAGCTG                       | 120bp              | qRT-PCR                          |
|                               | WRKY29 qRT_R                                | GCGTCCGACAACAGATTCTC                       |                    |                                  |
| <i>WRKY33</i><br>(AT2G38470)  | WRKY33 qRT_F                                | GCTGCTATTGCTGGTCACTCC                      | 201bp              | qRT-PCR                          |
|                               | WRKY33 qRT_R                                | GGTCTCCTGTTTGGTTCTTCC                      |                    |                                  |
| <i>CYP81F2</i><br>(At5g57220) | CYP81F2 qRT_F                               | GTGAAAGCACTAGCGAAGC                        | 183bp              | qRT-PCR                          |
|                               | CYP81F2 qRT_R                               | ATCCGTTCCAGCTAGCATCA                       |                    |                                  |
| <i>UBP22</i><br>(AT5G10790)   | UBP22 qRT_F                                 | GCCAAAGCTGTGGAGAAAAG                       | 159bp              | qRT-PCR (control)                |
|                               | UBP22 qRT_R                                 | TGTTTAGCGGAACGGATAC                        |                    |                                  |

**Supplemental Fig S1. Alignment analysis for *Msp40* homologies.** (A) Genomic structure of the *Msp40* homologies in five *Meloidogyne* species, exons are represented by black boxes and introns by a line. (B) Phylogenetic tree constructed by the neighbor-joining method, based on the derived *Msp40*-like proteins from five *Meloidogyne* species. The three *Msp40*-based clades corresponding to the divergence for reproduction modes and cytogenetical karyotypes among the tested species. “#”, data referenced from the previous description mainly (Castagnone-Sereno, 2006), *M. floridensis* belongs to diploid with only one karyotype (2n=36) (David et al., 2013), and other *Meloidogyne* species contained diverse chromosome numbers and aneuploid. The triploid and tetraploid were putative karyotypes.

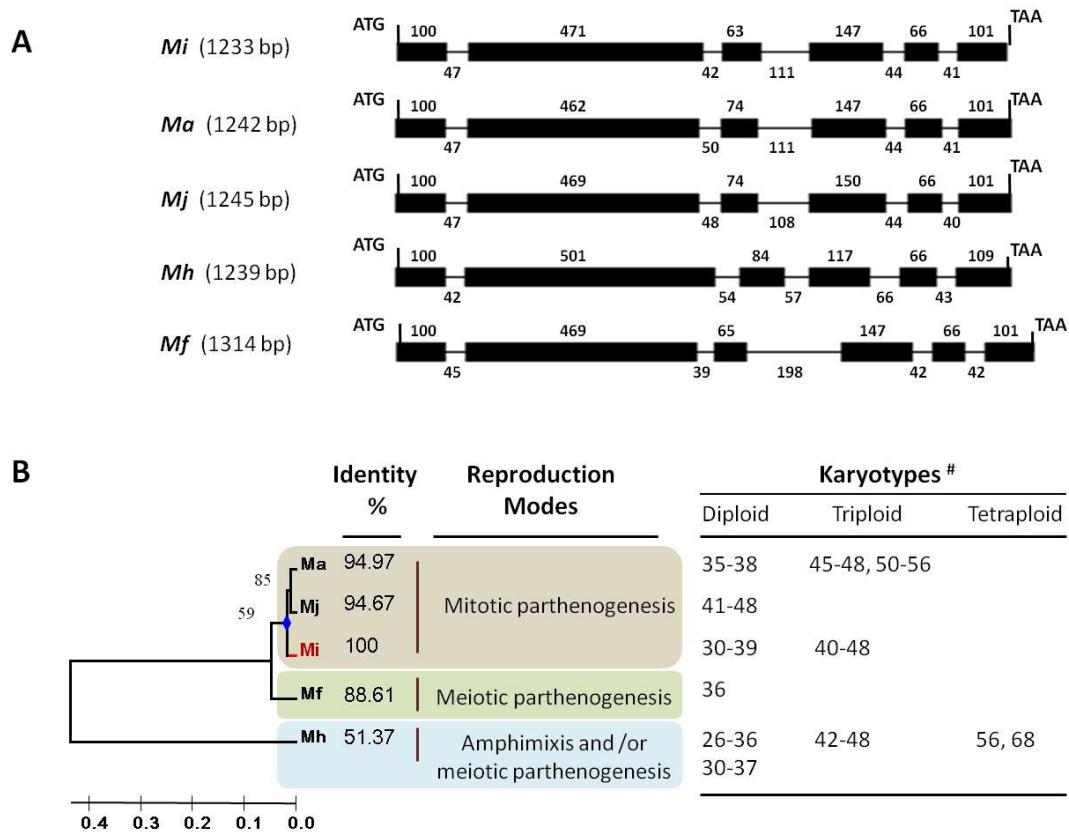

**Supplemental Fig S2. Subcellular localization of MiMsp40 in plant cells.** *MiMsp40* cDNA with and without signal peptide-coding sequence were fused to the joined GFP reporter gene respectively, and expressed in onion epidermal cells by particle bombardment. GFP fluorescence is mainly localized in the cytoplasm and the nucleus for both constructs.

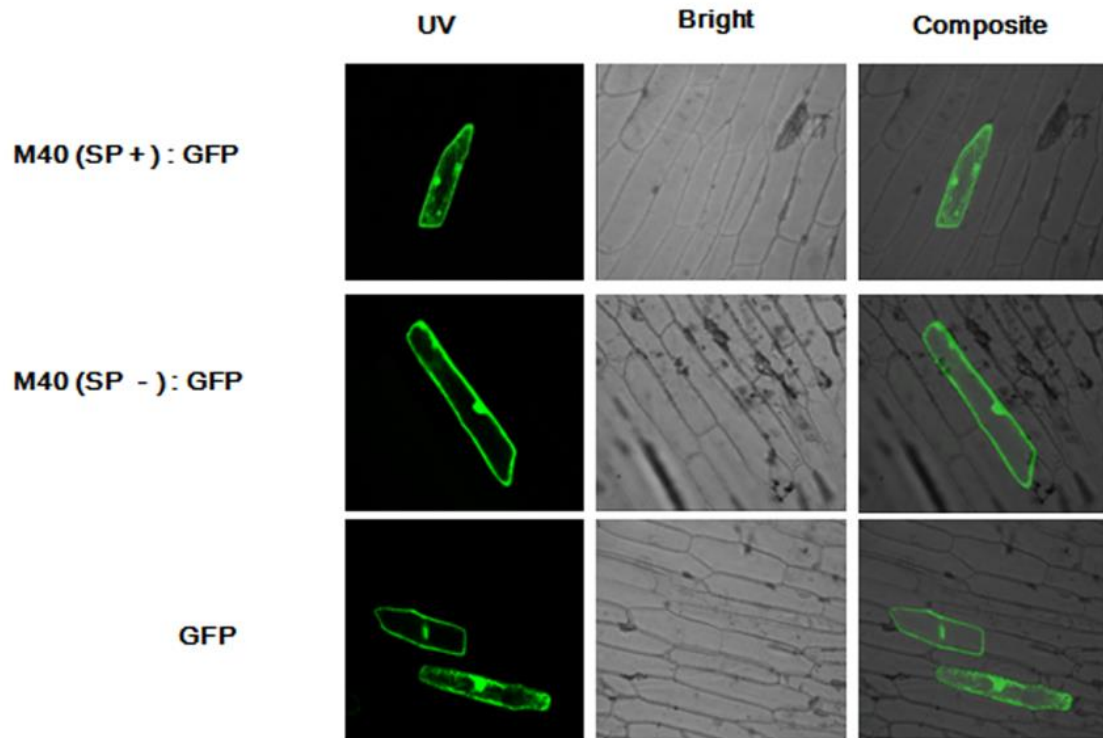

**Supplemental Fig S3. Effect of plant host-derived RNAi of *MiMsp40* on *M. incognita* infection.** (A) Root galls development of control (WT) and transgenic lines (TS1, TS2) of two different *MiMsp40* dsRNA cassette (TS1 RNAi and TS2 RNAi). (B) RT-PCR of the single-stranded CHAS intron of *MiMsp40* dsRNA hairpins confirmed the expression of TS1 and TS2 RNAi constructs in independent transgenic *Arabidopsis* lines.

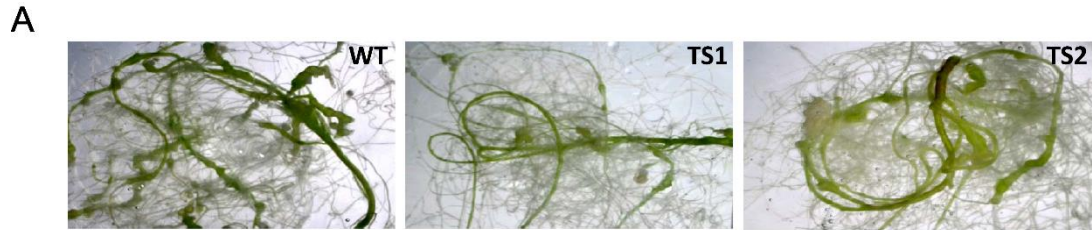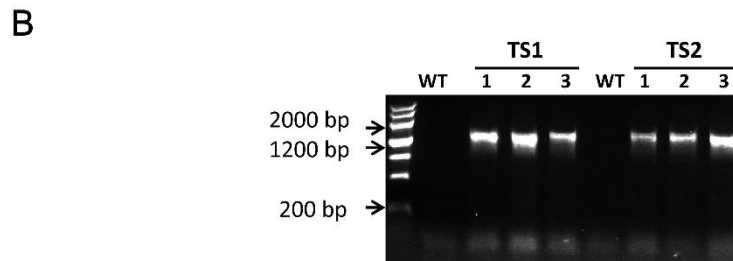

Supplement: srep19443-s1.pdf [file srep19443-s1.pdf]
